# Supplementary material
Source: publisher figshare collection journal article supplement (https://gsajournals.figshare.com/ndownloader/files/21823218)
Supplement: Supplementary file 1 [file 21823218]

**Figure S5**

eQTL enrichment as a function of the number of SNPs selected. LBR (Window): uses the metric. SMR: uses the *pvalue-*diff metric.
